# Supplementary material for: Expression of PAM50 Genes in Lung Cancer: Evidence that Interactions between Hormone Receptors and HER2/HER3 Contribute to Poor Outcome
Source: PubMed Central journal article supplement — Neoplasia. 2015 Dec 8;17(11):817–25. doi: 10.1016/j.neo.2015.11.002 (PMC4681883; doi:10.1016/j.neo.2015.11.002), 2015-12-08
Supplement: mmc1.pdf [file mmc1.pdf]

| <b>Supplemental Table 1. Pathway Analysis of PAM50 Genes</b> |                                                                                                                                                                                                                                                                                                                 |                                                                                                                       |                                                                                                                                                                                                                                                                   |                                                                                                            |
|--------------------------------------------------------------|-----------------------------------------------------------------------------------------------------------------------------------------------------------------------------------------------------------------------------------------------------------------------------------------------------------------|-----------------------------------------------------------------------------------------------------------------------|-------------------------------------------------------------------------------------------------------------------------------------------------------------------------------------------------------------------------------------------------------------------|------------------------------------------------------------------------------------------------------------|
|                                                              | Top 20 Genes<br>3 Networks Found<br><br>(Activation Scores)                                                                                                                                                                                                                                                     | P Value                                                                                                               | Top 7 Genes<br>1 Network Found                                                                                                                                                                                                                                    | P Value                                                                                                    |
| Canonical Signaling Pathways                                 | Neuregulin signaling<br>E2-Mediated S Phase Entry<br>Wnt/ $\beta$ -catenin signaling<br>Endometrial cancer signaling<br>HER2/HER3 signaling<br>Cell cycle G1/S checkpoint<br>Small cell lung cancer signaling<br>STAT3<br>HER2 signaling in breast cancer<br>Bladder cancer signaling                           | 8.8 e-5<br>2.6 e-4<br>6.0 e-4<br>1.2 e-3<br>1.5 e-3<br>1.8 e-3<br>2.2 e-3<br>2.4 e-3<br>2.6 e-3<br>3.4 e-3            | STAT3<br>Neuregulin signaling<br>Polyamine regulation<br>E2-mediated S phase entry<br>Thyroid cancer signaling<br>Transcriptional network/stem cells<br>Endometrial cancer signaling<br>Thrombopoietin signaling<br>HER2/HER3 signaling<br>Myc-mediated apoptosis | 2.8 e-4<br>4.0 e-4<br>7.7 e-3<br>8.4 e-3<br>1.4 e-2<br>1.4 e-2<br>1.8 e-2<br>1.9 e-2<br>2.0 e-2<br>2.0 e-2 |
| Upstream Regulators                                          | R5020 (1.96)<br>EP300<br>Trastuzumab<br>HOXB4<br>SMARCE-1<br>Neuregulin-1 (1.98)<br>Estrogen receptor<br>Letrozole<br>CCND1<br>$\beta$ -Estradiol (2.14)                                                                                                                                                        | 2.1 e-9<br>2.3 e-8<br>1.3 e-7<br>2.6 e-7<br>5.5 e-7<br>8.9 e-7<br>1.5 e-6<br>1.5 e-6<br>2.7 e-6<br>3.3 e-5            | Bazedoxifene<br>Premarin<br>HOXB4<br>SMARCE1<br>mTor<br>CSF1 Receptor<br>Letrozole<br>NRG1<br>EP300<br>Estrogen receptor                                                                                                                                          | 2.9 e-6<br>3.7 e-6<br>8.6 e-6<br>1.4 e-5<br>1.7 e-5<br>2.6 e-5<br>2.6 e-5<br>2.6 e-5<br>2.9 e-5<br>3.3 e-5 |
| Functions                                                    | Cancer<br>Reproductive system disease<br>Proliferation of breast cancer<br>Breast cancer<br>Invasion of tumor cells (2.37)<br>Viability of tumor cells (1.95)<br>Cell cycle progression (1.18)<br>Invasion of tumor cells (2.37)<br>S phase (1.95)<br>Cell cycle progression (1.18)<br>Advanced malignant tumor | 6.6 e-9<br>6.6 e-9<br>3.1 e-7<br>5.5 e-7<br>5.3 e-6<br>5.4 e-6<br>5.4 e-6<br>5.4 e-6<br>1.9 e-4<br>1.9 e-4<br>1.9 e-4 | Cell Migration<br>Proliferation of Tumor Cells<br>Cancer<br>Reproductive System Disease<br>Cell Cycle<br>Cell Development<br>Renal Cell Carcinoma<br>Breast Cancer<br>Cancer Progression<br>Bladder Cancer Development                                            | 4.2 e-7<br>5.2 e-6<br>7.0 e-6<br>1.1 e-5<br>1.4 e-5<br>4.2 e-5<br>1.4 e-4<br>1.6 e-4<br>2.4 e-4<br>2.6 e-4 |
