# Supplementary material for: Expression of PAM50 Genes in Lung Cancer: Evidence that Interactions between Hormone Receptors and HER2/HER3 Contribute to Poor Outcome
Source: PubMed Central journal article supplement — Neoplasia. 2015 Dec 8;17(11):817–25. doi: 10.1016/j.neo.2015.11.002 (PMC4681883; doi:10.1016/j.neo.2015.11.002), 2015-12-08
Supplement: mmc2.pdf [file mmc2.pdf]

| <b>Supplemental Table 2.</b> Survival Association of individual PAM50 Genes in TGCA Adenocarcinoma Data (P < 0.1) |                                   |                |                                      |                                         |          |
|-------------------------------------------------------------------------------------------------------------------|-----------------------------------|----------------|--------------------------------------|-----------------------------------------|----------|
| Gene                                                                                                              | Percent with Increased Expression | z-Score Cutoff | Median OS (mos.) Cases with Increase | Median OS (mos.) Cases without Increase | P Value  |
| ANLN                                                                                                              | 22.9                              | +1.5           | 28.4                                 | 52.6                                    | 0.000013 |
| MKI67                                                                                                             | 10.6                              | +1.5           | 34.3                                 | 49.2                                    | 0.000019 |
| NDC80                                                                                                             | 12.1                              | +2.0           | 20.5                                 | 46.7                                    | 0.0008   |
| CCNB1                                                                                                             | 8.4                               | +1.5           | 26.5                                 | 49.2                                    | 0.0008   |
| EXO1                                                                                                              | 6.9                               | +2.0           | 21.8                                 | 46.7                                    | 0.001    |
| CCNE1                                                                                                             | 9.6                               | +1.5           | 34.3                                 | 49.0                                    | 0.005    |
| CDC20                                                                                                             | 7.0                               | +2.0           | 28.1                                 | 46.7                                    | 0.0034   |
| BIRC5                                                                                                             | 10.2                              | +2.0           | 28.1                                 | 46.7                                    | 0.0048   |
| KRT5                                                                                                              | 2.1                               | +2.0           | 8.7                                  | 44.6                                    | 0.0056   |
| KRT17                                                                                                             | 3.2                               | +2.0           | 8.8                                  | 44.6                                    | 0.0076   |
| UBE2C                                                                                                             | 13.1                              | +1.5           | 28.6                                 | 49.2                                    | 0.0017   |
| CDH3                                                                                                              | 6.5                               | +1.5           | 25.5                                 | 47.8                                    | 0.010    |
| FGFR4                                                                                                             | 7.6                               | +1.5           | 35.3                                 | 47.8                                    | 0.013    |
| MELK                                                                                                              | 7.9                               | +2.0           | 20.5                                 | 45.3                                    | 0.015    |
| TYMS                                                                                                              | 13.2                              | +2.0           | 21.9                                 | 46.7                                    | 0.021    |
| CENPF                                                                                                             | 9.6                               | +1.5           | 34.3                                 | 49.2                                    | 0.017    |
| RRM2                                                                                                              | 13.1                              | +1.5           | 32.8                                 | 49.2                                    | 0.033    |
| PTTG1                                                                                                             | 8.4                               | +1.5           | 24.0                                 | 47.8                                    | 0.034    |
| EGFR                                                                                                              | 13.1                              | +2.0           | 32.4                                 | 44.6                                    | 0.043    |
| FOXA1                                                                                                             | 17.6                              | +1.5           | 49.2                                 | 42.3                                    | 0.049    |
| MYC                                                                                                               | 12.7                              | +1.5           | 35.3                                 | 46.7                                    | 0.075    |
| SLC39A6                                                                                                           | 10.6                              | +1.5           | 110.4                                | 42.5                                    | 0.097    |
| CDC6                                                                                                              | 14.1                              | +1.5           | 34.3                                 | 49.2                                    | 0.098    |
