# Supplementary material for: Expression of PAM50 Genes in Lung Cancer: Evidence that Interactions between Hormone Receptors and HER2/HER3 Contribute to Poor Outcome
Source: PubMed Central journal article supplement — Neoplasia. 2015 Dec 8;17(11):817–25. doi: 10.1016/j.neo.2015.11.002 (PMC4681883; doi:10.1016/j.neo.2015.11.002), 2015-12-08
Supplement: mmc3.pdf [file mmc3.pdf]

| <b>Supplemental Table 3.</b> Survival Association of individual PAM50 Genes in TGCA Squamous Cell Carcinoma Data (P< 0.1) |                                   |                |                                      |                                         |         |
|---------------------------------------------------------------------------------------------------------------------------|-----------------------------------|----------------|--------------------------------------|-----------------------------------------|---------|
| Gene                                                                                                                      | Percent with Increased Expression | z-Score Cutoff | Median OS (mos.) Cases with Increase | Median OS (mos.) Cases without Increase | P Value |
| KRT14                                                                                                                     | 6.2                               | +2.0           | 12.2                                 | 55.1                                    | 0.004   |
| MIA                                                                                                                       | 4.9                               | +1.5           | 17.7                                 | 54.4                                    | 0.0066  |
| EXO1                                                                                                                      | 3.5                               | +3.0           | 21.9                                 | 44.6                                    | 0.019   |
| RRM2                                                                                                                      | 14.9                              | +1.5           | 68.5                                 | 46.8                                    | 0.021   |
| MELK                                                                                                                      | 17.8                              | +1.5           | 79.1                                 | 46.8                                    | 0.035   |
| SLC39A6                                                                                                                   | 9.0                               | +2.0           | 43.2                                 | 48.3                                    | 0.036   |
| CDH3                                                                                                                      | 5.5                               | +1.5           | 31.7                                 | 54.5                                    | 0.039   |
| BLVRA                                                                                                                     | 15.9                              | +1.5           | 72.1                                 | 42.2                                    | 0.047   |
| ANLN                                                                                                                      | 9.8                               | +1.5           | 23.3                                 | 54.4                                    | 0.066   |
| UBE2T                                                                                                                     | 14.1                              | +1.5           | 56.3                                 | 46.9                                    | 0.074   |
| BIRC5                                                                                                                     | 3.0                               | +2.0           | Not reached                          | 44.2                                    | 0.09    |
